# Supplementary material for: Transcriptomic Signatures in Seeds of Apple (Malus domestica L. Borkh) during Fruitlet Abscission
Source: PLoS One. 2015 Mar 17;10(3):e0120503. doi: 10.1371/journal.pone.0120503 (PMC4364616; doi:10.1371/journal.pone.0120503)
Supplement: S2 Dataset — Only statistically significant genes are shown with FDR P-value correction ≤ 0,05. (XLSX) [file pone.0120503.s002.xlsx]

## Sheet: Foglio1
Differentially expressed (DE) genes between central and lateral apple seeds, statistically significant (P-value ≤ 0,05).
Feature ID	Experiment - Fold Change (normalized values)	Baggerley's test: LATERAL vs CENTRAL normalized values - P-value	Baggerley's test: LATERAL vs CENTRAL normalized values - FDR p-value correction	Central Apple Seeds - Normalized means	Lateral Apple Seeds - Normalized means
MDP0000304208	1.79769e+308	0.000184306	0.0226301	0	7.09839
MDP0000164489	1328.46	2.19651e-05	0.00402063	0.0300406	39.9076
MDP0000127858	241.46	1.24446e-05	0.00257474	0.0404079	9.75688
MDP0000152232	175.246	1.5008e-06	0.000427267	0.168745	29.5719
MDP0000715270	127.726	5.58356e-08	2.40081e-05	0.117313	14.984
MDP0000886138	123.48	1.28786e-14	2.40591e-11	0.164306	20.2885
MDP0000217508	101.378	0.000288294	0.032525	0.428183	43.4084
MDP0000254260	75.1236	0.000278796	0.0317055	0.571271	42.916
MDP0000170739	70.3351	0.000261979	0.0301452	0.961727	67.6431
MDP0000700383	65.401	9.11579e-05	0.0128383	2.19856	143.788
MDP0000769493	63.4766	1.89015e-06	0.000515265	1.18391	75.1505
MDP0000300351	61.9081	0.000206379	0.0244563	0.277073	17.1531
MDP0000545122	61.4522	0	0	0.928194	57.0395
MDP0000306121	61.3423	0.000324169	0.0359341	0.182628	11.2028
MDP0000885511	51.3773	6.47171e-07	0.000207608	0.170378	8.75354
MDP0000258775	51.2015	1.90225e-05	0.0035747	0.733706	37.5669
MDP0000733506	51.1145	0.000392605	0.0425548	0.253866	12.9762
MDP0000265157	48.4128	0.000122285	0.016352	2.25915	109.372
MDP0000745805	47.5761	4.37996e-06	0.0010578	1.76268	83.8616
MDP0000248516	40.1919	6.37422e-06	0.00147561	0.182112	7.31943
MDP0000303430	39.5161	0.00015992	0.020356	0.129744	5.12696
MDP0000058337	37.5418	6.82343e-13	9.22136e-10	0.587429	22.0532
MDP0000125709	37.4596	0.000455121	0.0478608	0.118536	4.44031
MDP0000290801	34.604	1.22839e-05	0.00255815	0.966101	33.4309
MDP0000232642	34.3787	9.86151e-08	3.99589e-05	3.4476	118.524
MDP0000347896	33.2926	1.45512e-08	7.45361e-06	3.25945	108.515
MDP0000326735	32.0975	2.04037e-12	2.54114e-09	0.564079	18.1055
MDP0000224773	29.8952	0.000299839	0.0337077	0.492838	14.7335
MDP0000162375	29.7214	1.07355e-06	0.000323168	0.295344	8.77805
MDP0000367430	29.6667	2.17307e-07	7.97845e-05	0.71147	21.1069
MDP0000307237	29.6158	3.86094e-07	0.000129754	2.89167	85.6393
MDP0000267621	29.365	0.000364856	0.0398188	0.241403	7.0888
MDP0000386815	26.8361	9.38763e-05	0.0131628	0.604375	16.2191
MDP0000166796	26.2725	0.00043077	0.0460461	3.30234	86.7607
MDP0000848905	26.2468	0.000114818	0.0155001	10.9818	288.238
MDP0000137225	24.7213	7.88336e-11	7.25692e-08	0.644307	15.9281
MDP0000290211	22.8078	5.85977e-08	2.4813e-05	1.09954	25.078
MDP0000688645	22.1868	0	0	33.6216	745.957
MDP0000137826	22.0698	2.61707e-06	0.000683267	0.434502	9.58936
MDP0000729348	21.3329	5.7422e-05	0.00884353	0.291447	6.2174
MDP0000836165	21.2368	4.36251e-06	0.00105761	0.381874	8.10976
MDP0000735747	20.8966	6.90982e-09	3.88399e-06	0.84075	17.5688
MDP0000195573	19.914	5.98216e-09	3.51823e-06	1.18388	23.5757
MDP0000188613	19.1328	0	0	3.34094	63.9216
MDP0000233440	18.2402	0	0	3.30544	60.292
MDP0000632640	18.2004	0.000255778	0.0295924	1.12926	20.553
MDP0000130267	17.4705	3.10083e-05	0.00534845	0.393883	6.88133
MDP0000791550	17.2644	2.51785e-05	0.0045177	3.47944	60.0705
MDP0000300714	16.9414	1.57109e-05	0.00312521	0.438874	7.43517
MDP0000889787	16.3988	6.71228e-05	0.0100553	3.57604	58.6427
MDP0000619638	15.96	8.08727e-06	0.00182804	2.03225	32.4346
MDP0000227657	15.7692	6.60319e-05	0.00991525	0.99333	15.664
MDP0000607000	15.4573	8.50472e-05	0.0122216	0.446245	6.89773
MDP0000195885	15.4324	0	0	16.8141	259.482
MDP0000755567	15.4155	7.87813e-08	3.29207e-05	64.213	989.875
MDP0000593263	15.1678	2.68748e-07	9.43096e-05	0.749305	11.3653
MDP0000293002	14.9338	2.62476e-06	0.000683267	0.659294	9.84577
MDP0000540373	14.8365	8.39065e-06	0.00188989	0.654314	9.70775
MDP0000135939	14.4364	5.0131e-12	5.7894e-09	1.35896	19.6185
MDP0000525995	14.3793	2.48257e-07	8.90879e-05	0.762217	10.9601
MDP0000197224	14.2742	5.88947e-11	5.84502e-08	1.23833	17.6762
MDP0000296179	14.2513	3.38843e-05	0.00577858	4.85205	69.1479
MDP0000640906	13.9385	2.79117e-07	9.68779e-05	0.820407	11.4353
MDP0000733075	13.2292	1.47842e-07	5.76101e-05	3.76887	49.8591
MDP0000316310	13.1588	0.000204552	0.0243306	0.4402	5.79249
MDP0000348107	13.0583	8.97997e-05	0.0127317	5.63104	73.5316
MDP0000223224	12.9576	6.93727e-05	0.0102962	1.14993	14.9003
MDP0000209662	12.8914	3.75145e-10	2.94174e-07	1.28488	16.5639
MDP0000923579	12.6829	1.71946e-06	0.000476921	0.764739	9.69911
MDP0000559039	12.6796	4.78483e-05	0.00764047	3.10117	39.3217
MDP0000321125	12.599	7.25637e-09	4.00785e-06	1.85189	23.332
MDP0000869501	12.422	1.12355e-13	1.77155e-10	1.89088	23.4886
MDP0000287288	11.9932	1.09094e-05	0.00232527	4.15247	49.8015
MDP0000570178	11.8919	3.53966e-06	0.000885152	1.45328	17.2823
MDP0000489978	11.8018	1.05511e-06	0.000319311	0.871339	10.2833
MDP0000127542	11.3231	2.32858e-06	0.000616269	7.55878	85.5886
MDP0000595671	11.2258	1.67559e-05	0.00328483	0.722024	8.10531
MDP0000266220	11.0793	4.9089e-05	0.00779497	1.40726	15.5914
MDP0000873667	10.9632	1.16487e-11	1.29805e-08	1.84909	20.272
MDP0000909262	10.582	4.3277e-09	2.6431e-06	1.44942	15.3377
MDP0000316397	10.5742	3.71349e-06	0.000914224	3.15646	33.377
MDP0000396630	10.4032	6.97924e-11	6.58761e-08	1.82806	19.0177
MDP0000269907	10.0389	7.81118e-09	4.24053e-06	27.0022	271.073
MDP0000777260	10.0328	8.77929e-05	0.0125311	0.693346	6.95617
MDP0000451570	9.99983	0.000169238	0.0210774	0.640325	6.40314
MDP0000573176	9.92037	3.02671e-05	0.00526513	8.16987	81.0481
MDP0000126873	9.70835	0	0	6.41633	62.292
MDP0000314777	9.48577	3.54564e-10	2.85074e-07	39.4996	374.685
MDP0000137468	9.43577	1.32048e-05	0.00270558	0.927819	8.75469
MDP0000135062	9.29167	0.000270361	0.0309415	0.771981	7.17299
MDP0000140678	9.25327	6.31211e-07	0.000203516	1.24506	11.5209
MDP0000407273	8.99478	1.0812e-06	0.000323936	1.23939	11.1481
MDP0000677411	8.66376	0.000160546	0.0203948	0.801688	6.94563
MDP0000858290	8.5041	7.66446e-05	0.0111657	2.91007	24.7475
MDP0000493644	8.49873	3.39344e-05	0.00577858	0.967569	8.22311
MDP0000235028	8.37586	1.45064e-05	0.0029344	2.39931	20.0963
MDP0000150055	8.35193	1.21768e-06	0.000358071	1.96401	16.4033
MDP0000208137	8.27878	1.12399e-12	1.45699e-09	6.51565	53.9417
MDP0000657861	8.1113	2.33689e-08	1.11603e-05	3.04045	24.662
MDP0000868045	8.03551	0	0	85.395	686.192
MDP0000804427	8.01965	8.3508e-09	4.49507e-06	4.87116	39.065
MDP0000791177	8.01757	5.3617e-05	0.00838816	2.7078	21.71
MDP0000804895	7.98908	2.20924e-05	0.00402075	1.84464	14.737
MDP0000225538	7.98434	4.39589e-08	1.93898e-05	5.77555	46.114
MDP0000343219	7.97458	2.65824e-08	1.24149e-05	1.90285	15.1744
MDP0000301666	7.94037	0.000262509	0.0301515	0.82412	6.54382
MDP0000267976	7.93003	4.25604e-05	0.00691384	1.04535	8.28966
MDP0000785886	7.88289	3.09448e-06	0.000789365	2.00051	15.7698
MDP0000217310	7.67751	2.25841e-05	0.0040985	1.88518	14.4735
MDP0000696624	7.67428	9.44063e-06	0.00208209	1.54079	11.8245
MDP0000272096	7.64193	3.58769e-05	0.00599683	1.11515	8.52191
MDP0000813278	7.6373	6.19392e-05	0.00938948	1.04843	8.00721
MDP0000279018	7.54746	5.63749e-10	4.22114e-07	2.84991	21.5096
MDP0000284467	7.41594	2.91261e-05	0.0051389	1.4519	10.7672
MDP0000312569	7.39345	0.000184281	0.0226301	2.40775	17.8016
MDP0000244504	7.32123	2.04289e-09	1.38041e-06	6.71583	49.1682
MDP0000702868	7.31345	1.07312e-07	4.314e-05	1.96312	14.3572
MDP0000241392	7.27858	0.00018265	0.0225269	1.43326	10.4321
MDP0000699845	7.24322	5.73054e-06	0.0013481	1.78033	12.8953
MDP0000258562	7.23721	5.66546e-05	0.00881993	1.25218	9.06226
MDP0000767063	7.18991	8.36873e-05	0.0120536	1.10246	7.92662
MDP0000893203	7.17035	7.97194e-08	3.29916e-05	2.06102	14.7782
MDP0000932913	7.08872	8.12491e-10	5.93184e-07	2.74402	19.4516
MDP0000295562	7.0198	0	0	5.7268	40.201
MDP0000648218	7.01366	1.16742e-05	0.00246569	5.41248	37.9613
MDP0000166168	6.98646	2.45131e-11	2.59499e-08	3.31095	23.1318
MDP0000175821	6.87279	1.1036e-05	0.0023444	1.47026	10.1048
MDP0000184760	6.86215	1.77356e-09	1.23792e-06	4.74053	32.5302
MDP0000759591	6.79889	3.28108e-07	0.000112045	2.15905	14.6791
MDP0000096349	6.74559	1.22569e-13	1.85362e-10	4.29903	28.9995
MDP0000161160	6.66022	0.000318235	0.035462	2.19997	14.6523
MDP0000302389	6.64884	0.000302711	0.0339705	1.04299	6.93471
MDP0000733336	6.56509	2.85927e-12	3.49254e-09	3.97199	26.0765
MDP0000811844	6.5579	1.0646e-09	7.59776e-07	3.03409	19.8973
MDP0000349988	6.54909	1.95024e-11	2.09955e-08	6.3678	41.7033
MDP0000119413	6.47522	9.6026e-07	0.000297526	2.25802	14.6212
MDP0000487271	6.45704	5.6958e-07	0.000185528	2.41483	15.5927
MDP0000839021	6.38871	2.71496e-10	2.21085e-07	15.8024	100.957
MDP0000319640	6.32899	1.68371e-05	0.00329059	1.78282	11.2835
MDP0000234782	6.24085	3.14667e-09	2.01886e-06	4.14569	25.8726
MDP0000258530	6.23604	7.48073e-05	0.0109989	13.0097	81.1292
MDP0000290737	6.22877	0.000180857	0.0223492	2.23265	13.9067
MDP0000471879	6.16117	6.54297e-11	6.29681e-08	4.88939	30.1244
MDP0000262032	6.13683	1.69533e-05	0.00329314	18.9923	116.553
MDP0000875111	6.13415	3.29982e-09	2.09595e-06	3.61264	22.1605
MDP0000173095	6.103	8.88875e-05	0.0126306	6.79827	41.4898
MDP0000812560	6.06116	1.87256e-06	0.00051267	2.39893	14.5403
MDP0000306198	6.03488	0.000151168	0.0194368	1.32812	8.01504
MDP0000168908	6.02946	4.44089e-16	9.72663e-13	6.51342	39.2724
MDP0000158129	5.92888	2.3691e-06	0.00062439	9.52366	56.4647
MDP0000213526	5.87709	1.02624e-10	9.31197e-08	4.21567	24.7759
MDP0000128562	5.8747	1.61516e-07	6.2555e-05	2.64677	15.549
MDP0000140635	5.87151	1.70057e-05	0.00329314	18.6294	109.383
MDP0000629002	5.84214	5.64696e-08	2.40724e-05	2.91982	17.058
MDP0000161869	5.83943	1.10887e-06	0.000330668	2.30988	13.4884
MDP0000761026	5.825	1.75237e-08	8.72639e-06	21.7765	126.848
MDP0000826052	5.80474	2.174e-05	0.00399092	6.19618	35.9672
MDP0000197984	5.77596	2.03708e-09	1.38041e-06	3.79572	21.9239
MDP0000387483	5.76892	1.74051e-05	0.00336024	1.83082	10.5619
MDP0000909752	5.75935	1.1993e-07	4.79094e-05	6.68434	38.4975
MDP0000179654	5.70598	2.13174e-06	0.000571316	2.26823	12.9425
MDP0000320017	5.66454	0	0	8.94752	50.6836
MDP0000257728	5.58933	0.000185049	0.0226469	1.4576	8.14698
MDP0000132623	5.57913	0.000104849	0.0143837	20.8534	116.344
MDP0000181915	5.57343	0	0	9.03881	50.3772
MDP0000310094	5.56705	4.43251e-05	0.00712225	2.6674	14.8495
MDP0000615948	5.54543	5.55902e-11	5.60464e-08	14.8011	82.0785
MDP0000385497	5.54125	1.14353e-13	1.77155e-10	18.1626	100.643
MDP0000834180	5.52095	0	0	19.4997	107.657
MDP0000197200	5.42567	5.73693e-05	0.00884353	2.47358	13.4208
MDP0000885990	5.40376	0	0	28.8579	155.941
MDP0000442260	5.36066	8.01148e-10	5.91704e-07	14.4645	77.5393
MDP0000297880	5.28984	9.87696e-08	3.99589e-05	33.5757	177.61
MDP0000368719	5.27531	8.39773e-13	1.11125e-09	21.3853	112.814
MDP0000811444	5.27402	2.31334e-08	1.11315e-05	3.57328	18.8456
MDP0000899816	5.24682	2.56383e-09	1.68838e-06	18.4272	96.6843
MDP0000322543	5.23137	7.99896e-08	3.29916e-05	31.0678	162.527
MDP0000186484	5.17318	0.000422157	0.0454477	1.46884	7.59857
MDP0000267664	5.1645	3.21131e-06	0.00081589	31.3536	161.926
MDP0000186485	5.14237	0.000480505	0.0499513	1.4545	7.47956
MDP0000761113	5.13915	1.50385e-05	0.00301132	2.83292	14.5588
MDP0000195385	5.0939	6.83486e-06	0.00156162	2.45292	12.4949
MDP0000808076	5.05022	2.03482e-09	1.38041e-06	11.8718	59.9549
MDP0000173809	5.01091	6.64261e-08	2.79416e-05	5.41592	27.1387
MDP0000423544	4.97561	3.56183e-05	0.00598509	2.15394	10.7172
MDP0000319225	4.96263	5.59607e-10	4.22114e-07	14.6501	72.7031
MDP0000254554	4.94126	6.55142e-05	0.00986082	39.0834	193.121
MDP0000158045	4.94062	2.10559e-08	1.02878e-05	4.00343	19.7794
MDP0000829416	4.90383	1.08802e-13	1.77155e-10	7.12788	34.9539
MDP0000231674	4.86982	3.50439e-05	0.0059042	2.23711	10.8943
MDP0000279708	4.86981	4.48016e-07	0.000148212	3.34383	16.2838
MDP0000372629	4.86693	2.69431e-06	0.000698509	10.3424	50.3356
MDP0000928620	4.85983	3.26506e-06	0.000826241	2.83899	13.797
MDP0000249183	4.80791	8.88178e-16	1.81982e-12	156.449	752.195
MDP0000921896	4.80543	0.000471459	0.0490912	1.63367	7.85046
MDP0000251418	4.79082	3.81145e-07	0.000128772	3.72708	17.8558
MDP0000128468	4.78203	3.19897e-08	1.46885e-05	5.26959	25.1994
MDP0000122734	4.7674	0.000470062	0.0490261	6.45137	30.7563
MDP0000265269	4.73313	0	0	11.0903	52.4918
MDP0000767260	4.71613	4.63784e-09	2.80554e-06	24.749	116.719
MDP0000311522	4.71544	3.64568e-08	1.65402e-05	4.18568	19.7373
MDP0000270745	4.69602	5.5941e-08	2.40081e-05	4.10002	19.2538
MDP0000166704	4.69339	3.60479e-06	0.000890916	3.27641	15.3775
MDP0000254231	4.63942	5.14814e-05	0.00809392	2.32647	10.7935
MDP0000253074	4.57162	3.57394e-05	0.0059896	58.2635	266.359
MDP0000780674	4.55772	7.11086e-07	0.000226965	11.1228	50.6944
MDP0000410116	4.54675	0.000198017	0.0237759	2.79375	12.7025
MDP0000140078	4.53664	2.62488e-10	2.16526e-07	12.6542	57.4076
MDP0000158520	4.5276	0.000164134	0.0206541	13.2346	59.9209
MDP0000514115	4.50844	1.58788e-05	0.00314197	4.41067	19.8852
MDP0000325582	4.49375	8.21565e-15	1.58131e-11	25.4703	114.457
MDP0000568045	4.48332	1.78844e-10	1.53509e-07	45.2858	203.031
MDP0000894041	4.47342	2.81879e-06	0.000721939	65.0243	290.881
MDP0000135204	4.4456	4.69285e-11	4.80767e-08	95.1594	423.04
MDP0000839696	4.35445	7.23326e-06	0.00164167	15.2645	66.4685
MDP0000425030	4.3132	2.15913e-05	0.00397512	2.91109	12.5561
MDP0000331021	4.27454	5.49625e-09	3.29344e-06	6.07302	25.9594
MDP0000297771	4.23117	0.000107461	0.0146473	6.52679	27.616
MDP0000225539	4.22101	6.17886e-05	0.00938905	3.27137	13.8085
MDP0000222555	4.18116	5.32048e-08	2.31467e-05	13.6856	57.2215
MDP0000189486	4.17365	2.00784e-07	7.63665e-05	4.62729	19.3127
MDP0000787281	4.17149	0.000314617	0.0351204	6.22762	25.9785
MDP0000323779	4.17055	2.16768e-07	7.97845e-05	8.31326	34.6708
MDP0000915138	4.11958	2.06837e-07	7.77377e-05	13.6097	56.0661
MDP0000205216	4.0786	1.47477e-05	0.00296433	4.03654	16.4634
MDP0000723277	4.07375	2.02996e-07	7.67481e-05	10.2864	41.9042
MDP0000222176	4.06008	0	0	17.782	72.1965
MDP0000161388	4.05064	6.38873e-06	0.00147561	3.68459	14.9249
MDP0000449901	3.98988	3.71733e-10	2.94174e-07	10.9136	43.5438
MDP0000211202	3.98147	0.000457601	0.048042	2.80388	11.1636
MDP0000681654	3.97174	3.01859e-11	3.14314e-08	22.0383	87.5304
MDP0000321440	3.95834	6.04925e-05	0.00925856	6.47794	25.6419
MDP0000550058	3.94137	0.000463567	0.0484282	2.33346	9.19704
MDP0000300295	3.9209	6.00048e-06	0.00140122	12.8014	50.1928
MDP0000879957	3.91748	2.46536e-05	0.00444337	3.42612	13.4218
MDP0000180062	3.89785	2.63901e-05	0.0046953	13.2582	51.6785
MDP0000140483	3.89088	1.08219e-05	0.00232221	25.8882	100.728
MDP0000293087	3.81188	2.66454e-15	5.28885e-12	13.9737	53.2662
MDP0000916403	3.8083	0	0	33.1579	126.275
MDP0000330372	3.79611	9.73377e-06	0.00213193	4.62283	17.5488
MDP0000162244	3.79132	1.29429e-07	5.13809e-05	7.14135	27.0752
MDP0000565690	3.78512	1.98777e-10	1.68343e-07	8.32339	31.505
MDP0000294168	3.77621	9.95659e-05	0.0137781	3.43556	12.9734
MDP0000606470	3.74774	0.000107996	0.0146886	3.14236	11.7767
MDP0000218935	3.74331	0	0	22.0229	82.4386
MDP0000194823	3.73095	3.71329e-05	0.00615815	3.59721	13.421
MDP0000292807	3.72884	6.61432e-06	0.00151669	5.37076	20.0267
MDP0000715346	3.72862	0.000287175	0.0325142	2.78435	10.3818
MDP0000481448	3.68722	0.000110787	0.015036	10.1584	37.4562
MDP0000342721	3.67747	3.96128e-13	5.46975e-10	11.4533	42.119
MDP0000262990	3.67245	1.08154e-05	0.00232221	10.65	39.1115
MDP0000169913	3.61065	9.52793e-12	1.08069e-08	15.8322	57.1646
MDP0000231668	3.5893	4.83716e-05	0.0077003	3.76727	13.5219
MDP0000130701	3.56905	7.70495e-14	1.32269e-10	14.889	53.1396
MDP0000210067	3.56837	3.28426e-12	3.86308e-09	12.2554	43.7317
MDP0000697620	3.54825	4.78755e-05	0.00764047	4.56847	16.2101
MDP0000233691	3.54715	2.09075e-05	0.00390583	20.0287	71.0448
MDP0000851893	3.54038	2.11784e-05	0.00394331	4.24008	15.0115
MDP0000160077	3.53106	1.50763e-05	0.00301132	6.7549	23.852
MDP0000928608	3.52202	3.86312e-06	0.00094739	6.13043	21.5915
MDP0000776583	3.49376	0.000120122	0.0160966	7.99495	27.9324
MDP0000261679	3.45559	3.72623e-08	1.66675e-05	21.3579	73.8043
MDP0000881409	3.45493	4.44041e-05	0.00712225	23.7606	82.0911
MDP0000575967	3.4474	0.000228769	0.0268094	3.36069	11.5857
MDP0000243369	3.41969	1.40071e-05	0.00284684	4.74762	16.2354
MDP0000501598	3.41831	4.25039e-05	0.00691384	11.4023	38.9765
MDP0000737474	3.38168	0.000126575	0.0167663	3.78297	12.7928
MDP0000282446	3.35854	0.000140596	0.018225	3.78549	12.7137
MDP0000189006	3.34825	0.000161648	0.0204542	3.95969	13.258
MDP0000138538	3.29138	2.29044e-05	0.00414478	6.54587	21.545
MDP0000773084	3.28857	0.00016198	0.0204542	5.56294	18.2941
MDP0000759646	3.26998	0.000304904	0.0341562	19.828	64.8373
MDP0000950987	3.26746	0.0004277	0.0458115	18.9752	62.0006
MDP0000795631	3.23897	4.43998e-06	0.00106824	5.93738	19.231
MDP0000125095	3.23869	1.64313e-14	2.98191e-11	17.3119	56.0678
MDP0000920394	3.20061	2.38417e-10	1.99257e-07	11.6009	37.1299
MDP0000187900	3.17185	0	0	57.7784	183.264
MDP0000263150	3.1664	0.000138521	0.0180665	28.686	90.8314
MDP0000398010	3.1601	2.77332e-06	0.00071317	7.41282	23.4253
MDP0000426862	3.1599	1.05571e-06	0.000319311	7.08105	22.3754
MDP0000196961	3.13022	0.000284751	0.0322974	25.5705	80.0412
MDP0000416548	3.12142	1.36733e-06	0.000392981	42.2215	131.791
MDP0000153707	3.11897	1.75855e-08	8.72639e-06	31.4854	98.2021
MDP0000391295	3.10758	9.77443e-06	0.00213348	6.02764	18.7314
MDP0000503940	3.08083	9.44223e-07	0.000295439	18.5344	57.1012
MDP0000598183	3.04106	4.39038e-05	0.00709577	5.39803	16.4157
MDP0000811129	3.04059	3.56533e-06	0.000887106	8.25223	25.0917
MDP0000304881	3.03416	1.40648e-07	5.51452e-05	11.1562	33.8497
MDP0000906293	3.03181	1.62832e-06	0.000459671	8.29429	25.1467
MDP0000190256	3.02057	2.25088e-07	8.21662e-05	37.5921	113.549
MDP0000219007	2.99417	5.89411e-06	0.00138146	7.82731	23.4363
MDP0000340616	2.99281	0.000441706	0.0467598	4.1379	12.384
MDP0000736035	2.96225	1.60597e-08	8.09573e-06	10.949	32.4336
MDP0000223749	2.96007	0.00043134	0.0460461	4.25746	12.6024
MDP0000231519	2.95499	5.64883e-10	4.22114e-07	13.2585	39.1789
MDP0000755364	2.9423	0	0	123.684	363.914
MDP0000570901	2.93947	5.08317e-05	0.00805157	17.0515	50.1226
MDP0000680183	2.93235	3.66261e-05	0.00609	5.98124	17.5391
MDP0000290858	2.92942	1.35859e-08	7.07324e-06	11.3452	33.235
MDP0000504522	2.91639	6.13839e-09	3.57699e-06	12.011	35.0287
MDP0000124013	2.89698	0.000133604	0.0175334	7.13267	20.6632
MDP0000306700	2.88723	2.35788e-07	8.55804e-05	9.71886	28.0606
MDP0000479094	2.88272	2.9925e-12	3.58631e-09	24.349	70.1915
MDP0000135837	2.87588	5.11836e-05	0.00807776	6.02251	17.32
MDP0000150261	2.87573	2.03289e-06	0.00054946	8.28502	23.8255
MDP0000158047	2.86722	1.80128e-06	0.000497442	123.633	354.482
MDP0000697030	2.82854	1.57449e-05	0.00312521	29.3424	82.9962
MDP0000197242	2.82049	8.61858e-07	0.000272351	9.30439	26.2429
MDP0000316189	2.81629	1.03392e-06	0.000315729	21.0679	59.3333
MDP0000337873	2.81523	0.000132948	0.0174834	100.184	282.041
MDP0000481989	2.80988	4.7165e-07	0.000155222	11.124	31.257
MDP0000924890	2.79594	2.22789e-06	0.000594575	15.0113	41.9707
MDP0000581831	2.79252	1.97545e-06	0.000536215	10.6457	29.7283
MDP0000561838	2.76841	3.10717e-05	0.00534845	6.96932	19.294
MDP0000527266	2.75726	1.31732e-06	0.000382066	28.4738	78.5096
MDP0000620549	2.75549	9.23234e-05	0.0129737	14.053	38.723
MDP0000137705	2.73213	1.15819e-09	8.17386e-07	131.787	360.059
MDP0000898473	2.71858	0.000164213	0.0206541	5.96011	16.203
MDP0000826966	2.71652	1.62474e-05	0.00319499	15.1039	41.0299
MDP0000631284	2.70501	0.000195889	0.0236545	5.89238	15.9389
MDP0000202657	2.68896	2.71779e-05	0.00482196	9.2635	24.9092
MDP0000197360	2.65679	3.45412e-09	2.17223e-06	50.7285	134.775
MDP0000370964	2.64733	0.000168801	0.0210643	16.8222	44.5337
MDP0000934739	2.63468	2.12586e-06	0.000571316	10.1911	26.8505
MDP0000477621	2.62566	2.53914e-05	0.00454305	26.491	69.5564
MDP0000703817	2.617	1.7005e-05	0.00329314	8.52971	22.3222
MDP0000128924	2.60624	9.3686e-06	0.0020734	28.0579	73.1257
MDP0000291081	2.60154	2.16474e-07	7.97845e-05	12.5809	32.7298
MDP0000291220	2.60074	6.66134e-16	1.41036e-12	102.862	267.516
MDP0000158046	2.58633	2.94529e-05	0.00517762	22.8878	59.1953
MDP0000135149	2.56105	4.5755e-06	0.00109444	98.5251	252.328
MDP0000293524	2.56084	0.000123657	0.0164661	7.17943	18.3854
MDP0000932963	2.55715	9.03874e-06	0.00202153	14.6324	37.4172
MDP0000227677	2.53541	0.000158531	0.0202197	13.2042	33.4781
MDP0000312032	2.53346	0.000446471	0.0471856	6.17427	15.6422
MDP0000155667	2.52137	9.04729e-05	0.0127701	7.77206	19.5963
MDP0000940411	2.51791	3.04233e-05	0.00526539	8.85102	22.2861
MDP0000648621	2.48539	2.4423e-08	1.14909e-05	19.8755	49.3983
MDP0000553473	2.48421	8.1577e-05	0.011803	33.7685	83.8878
MDP0000590116	2.48011	0.000437788	0.0464999	9.62767	23.8777
MDP0000130123	2.474	0	0	45.3306	112.148
MDP0000756341	2.47278	5.68489e-05	0.00882853	8.64805	21.3847
MDP0000232789	2.46163	1.65621e-06	0.000463424	12.3994	30.5227
MDP0000629440	2.46087	3.98526e-05	0.00657485	35.912	88.3745
MDP0000286818	2.44777	0.000194849	0.0235738	7.61038	18.6284
MDP0000771404	2.41402	9.99264e-09	5.33363e-06	26.1487	63.1236
MDP0000950422	2.41154	1.36316e-06	0.000392981	20.5285	49.5052
MDP0000185480	2.40994	4.42243e-05	0.00712225	17.8109	42.9233
MDP0000271045	2.40984	2.59686e-06	0.00068159	26.5592	64.0032
MDP0000360438	2.40901	2.73589e-05	0.00484054	172.505	415.568
MDP0000246280	2.38846	2.86045e-07	9.87431e-05	43.3288	103.489
MDP0000203818	2.35396	2.95086e-05	0.00517762	20.6725	48.6622
MDP0000643283	2.32495	3.97946e-05	0.00657485	43.266	100.591
MDP0000299313	2.31336	4.34298e-06	0.00105691	13.5144	31.2638
MDP0000700015	2.31125	2.60664e-07	9.30147e-05	31.832	73.5717
MDP0000177891	2.30652	0.000102405	0.0141095	9.74433	22.4755
MDP0000103621	2.3015	0.000237433	0.0276209	62.0454	142.797
MDP0000862169	2.283	1.39417e-08	7.19946e-06	80.241	183.19
MDP0000846503	2.2726	7.5692e-05	0.0110895	12.0155	27.3063
MDP0000864747	2.26988	2.0422e-08	1.00554e-05	43.1577	97.9628
MDP0000135974	2.26792	1.11424e-06	0.000330715	16.072	36.4499
MDP0000242922	2.26721	1.1766e-08	6.17638e-06	26.3365	59.7102
MDP0000191329	2.26662	0.000102866	0.0141423	14.4896	32.8424
MDP0000362677	2.26628	7.64934e-05	0.0111657	14.7154	33.3492
MDP0000307842	2.25029	8.36882e-05	0.0120536	27.0959	60.9737
MDP0000508761	2.24959	6.74343e-05	0.0100782	11.0168	24.7833
MDP0000673223	2.24614	2.59792e-14	4.58367e-11	111.365	250.141
MDP0000949757	2.23099	0.000217765	0.0257576	11.1962	24.9786
MDP0000923289	2.22107	1.25871e-06	0.000366741	16.9115	37.5616
MDP0000803773	2.21835	4.2703e-05	0.0069193	12.1034	26.8495
MDP0000235102	2.21101	9.15045e-10	6.60465e-07	32.0312	70.8212
MDP0000103627	2.20953	0.000127588	0.0168483	63.0174	139.239
MDP0000127501	2.19079	3.53504e-09	2.20133e-06	61.1623	133.994
MDP0000310202	2.19028	1.3832e-10	1.20351e-07	30.9136	67.7094
MDP0000336462	2.1874	4.0731e-05	0.00670235	38.7077	84.6691
MDP0000945764	2.17998	0	0	58.3274	127.153
MDP0000325497	2.16333	1.21226e-05	0.00253286	14.9155	32.2671
MDP0000324718	2.13962	6.93795e-05	0.0102962	24.4539	52.322
MDP0000278295	2.132	0.000172718	0.0214268	11.4928	24.5027
MDP0000878470	2.12976	0.000122808	0.0163874	12.0551	25.6746
MDP0000332194	2.12787	0.000338874	0.0373685	10.5255	22.3969
MDP0000320419	2.12161	0.000424116	0.0455814	10.2752	21.7999
MDP0000033458	2.10546	0.00025886	0.0298945	11.3055	23.8033
MDP0000245896	2.09369	0.000149404	0.0192489	16.7039	34.9727
MDP0000128252	2.08909	5.9989e-07	0.000194404	23.4658	49.0222
MDP0000362676	2.08604	3.42253e-05	0.00579703	16.1292	33.6461
MDP0000920434	2.06552	9.87948e-07	0.000304619	47.6259	98.3725
MDP0000198741	2.05161	9.524e-05	0.0133246	14.0073	28.7376
MDP0000799020	2.04192	2.13506e-05	0.00394331	17.353	35.4336
MDP0000021376	2.0416	0.00029264	0.0329567	46.5536	95.0437
MDP0000247652	2.04106	0.000114939	0.0155001	13.9113	28.3938
MDP0000309382	2.0397	1.82077e-12	2.31299e-09	53.0403	108.186
MDP0000133507	2.0346	7.69909e-09	4.21572e-06	45.0573	91.6735
MDP0000659853	2.02713	3.21441e-08	1.46885e-05	180.853	366.613
MDP0000143661	2.02648	1.75991e-05	0.00338544	18.0513	36.5806
MDP0000563240	2.02547	3.92131e-13	5.46975e-10	78.49	158.979
MDP0000730456	2.02048	0.000184555	0.0226301	40.489	81.8072
MDP0000142389	2.00899	7.57728e-05	0.0110895	23.0193	46.2455
MDP0000398616	2.00681	0.000261431	0.0301366	13.1782	26.4461
MDP0000307941	1.99944	2.20816e-05	0.00402075	18.0172	36.0242
MDP0000277208	1.97962	0.00031029	0.0346984	22.5506	44.6416
MDP0000279125	1.97495	8.4821e-14	1.41778e-10	58.0974	114.739
MDP0000608906	1.97457	0.000459656	0.0481345	12.8116	25.2974
MDP0000238339	1.96337	0.000202835	0.0242026	14.6925	28.8467
MDP0000928242	1.96336	3.52065e-06	0.000883878	39.2663	77.094
MDP0000356353	1.95436	4.21593e-05	0.00688389	18.1333	35.4391
MDP0000813339	1.95163	1.16199e-10	1.03953e-07	45.4573	88.716
MDP0000238589	1.94485	0	0	191.474	372.389
MDP0000285927	1.91498	0.000221261	0.0261	15.8322	30.3182
MDP0000313281	1.9117	2.87783e-07	9.8806e-05	46.3559	88.6184
MDP0000237908	1.90423	0.000167094	0.0209336	59.0372	112.42
MDP0000347813	1.8961	6.5379e-05	0.00986082	19.1865	36.3796
MDP0000323342	1.88393	0	0	336.336	633.633
MDP0000339918	1.86499	9.61728e-05	0.0134186	25.8881	48.2811
MDP0000276765	1.86385	0.000186003	0.0227199	20.4988	38.2066
MDP0000194889	1.86224	0.000139037	0.0180967	18.6268	34.6876
MDP0000253476	1.86205	3.94762e-07	0.000131969	34.8229	64.8418
MDP0000869624	1.85707	9.53087e-07	0.000296751	84.3044	156.559
MDP0000286807	1.84492	0.000156418	0.0200307	22.558	41.6176
MDP0000906869	1.84409	0	0	414.319	764.04
MDP0000423529	1.84184	8.00932e-05	0.0116148	45.6114	84.009
MDP0000187921	1.83525	3.63587e-05	0.00606141	23.1001	42.3945
MDP0000669738	1.82817	5.12514e-05	0.00807776	22.5428	41.212
MDP0000295339	1.80726	1.78022e-05	0.00339562	26.4362	47.777
MDP0000518147	1.8026	2.67699e-07	9.43096e-05	111.924	201.754
MDP0000244238	1.80111	8.73848e-05	0.0125292	27.6108	49.7301
MDP0000503246	1.79555	0.00040618	0.0438764	18.4092	33.0546
MDP0000317227	1.77409	0.000383233	0.0416812	22.7777	40.4097
MDP0000247088	1.7733	6.61555e-09	3.78558e-06	246.493	437.105
MDP0000145486	1.76649	0.000432137	0.0460537	35.7234	63.1049
MDP0000286750	1.75786	2.2593e-06	0.000600434	35.7878	62.9102
MDP0000290847	1.75201	0.000203095	0.0242026	22.3883	39.2245
MDP0000326990	1.7428	1.82799e-05	0.00346592	79.1389	137.923
MDP0000642609	1.73882	6.0306e-11	5.89301e-08	75.3215	130.97
MDP0000287242	1.73656	1.14034e-08	6.0359e-06	54.7854	95.1382
MDP0000214612	1.73642	0.000194281	0.0235499	23.3539	40.5522
MDP0000096208	1.73467	0.000175572	0.0217384	478.129	829.394
MDP0000547069	1.73372	4.20085e-05	0.00687695	28.3989	49.2359
MDP0000252463	1.71025	3.43379e-06	0.000865493	38.6048	66.0238
MDP0000641053	1.70485	1.01822e-06	0.000312438	50.4734	86.0497
MDP0000915743	1.7029	4.17891e-05	0.0068587	30.6136	52.1318
MDP0000154436	1.7003	0.000191811	0.023295	25.5286	43.4063
MDP0000611440	1.69615	1.66926e-06	0.000465027	388.705	659.301
MDP0000279453	1.68984	5.20882e-05	0.00816911	30.8426	52.1191
MDP0000270796	1.67186	0.000246851	0.0286117	96.2398	160.9
MDP0000266732	1.66888	0	0	141.804	236.654
MDP0000929403	1.66368	2.68036e-07	9.43096e-05	54.0336	89.8944
MDP0000219689	1.65929	1.12975e-06	0.00033376	48.3153	80.1692
MDP0000330029	1.65208	2.36224e-09	1.5794e-06	513.322	848.048
MDP0000875018	1.65154	4.10432e-09	2.53101e-06	71.9778	118.874
MDP0000728753	1.63737	0.000196606	0.0236961	43.7358	71.6117
MDP0000781028	1.63534	5.73002e-05	0.00884353	61.3739	100.367
MDP0000170822	1.62831	8.50545e-07	0.00027012	53.7904	87.5875
MDP0000315706	1.62447	0.000225211	0.0264902	30.5262	49.589
MDP0000155446	1.60356	1.29369e-05	0.00265927	152.614	244.725
MDP0000243556	1.59071	1.22607e-06	0.000358877	66.0884	105.128
MDP0000257953	1.57086	0.0004491	0.0473846	32.3853	50.8728
MDP0000306901	1.56258	0.000390055	0.0423506	33.949	53.0479
MDP0000273751	1.55925	0.000234657	0.0273984	36.9049	57.544
MDP0000119630	1.54648	1.46472e-05	0.00295349	260.955	403.563
MDP0000189200	1.53995	2.49578e-13	3.68662e-10	256.192	394.523
MDP0000197166	1.53707	9.82329e-06	0.0021368	57.3012	88.0759
MDP0000235400	1.53363	2.72608e-07	9.51387e-05	78.3916	120.224
MDP0000653408	1.53281	3.03389e-05	0.00526513	330.503	506.599
MDP0000320059	1.52893	0.000339599	0.0373836	38.6816	59.1414
MDP0000749713	1.52837	9.01252e-05	0.0127494	46.2857	70.7417
MDP0000192236	1.52811	0.000264201	0.030291	278.575	425.694
MDP0000323212	1.52632	4.76842e-10	3.6936e-07	598.376	913.311
MDP0000250515	1.51529	3.41395e-05	0.00579703	54.2195	82.1584
MDP0000139219	1.50839	0.000382414	0.0416634	46.3406	69.8997
MDP0000521934	-1.50004	2.13264e-08	1.03404e-05	156.808	104.536
MDP0000906542	-1.50885	7.00466e-05	0.0103469	106.482	70.5716
MDP0000193777	-1.52593	0.000115992	0.0156091	69.0051	45.2217
MDP0000364657	-1.54016	2.10305e-07	7.85761e-05	149.054	96.7782
MDP0000499122	-1.5552	0.000226761	0.0266232	267.756	172.168
MDP0000134273	-1.57569	1.50229e-11	1.64519e-08	756.528	480.124
MDP0000183470	-1.59111	0.000148805	0.0192107	56.5836	35.5625
MDP0000126616	-1.59146	0.000136537	0.0178812	69.8777	43.908
MDP0000141538	-1.62823	0.000235696	0.0274692	48.8724	30.0156
MDP0000143641	-1.64032	4.39009e-07	0.000145992	90.9085	55.4211
MDP0000120560	-1.67314	9.82867e-05	0.0136307	314.051	187.702
MDP0000751780	-1.7061	1.16846e-05	0.00246569	59.3053	34.7607
MDP0000923711	-1.71135	1.32687e-07	5.23472e-05	85.0487	49.6969
MDP0000423596	-1.71276	3.70671e-08	1.66675e-05	92.3576	53.9234
MDP0000286908	-1.72111	0.000459997	0.0481345	36.839	21.4043
MDP0000213770	-1.75785	2.46943e-05	0.00444337	99.3262	56.5045
MDP0000255770	-1.8023	3.20191e-05	0.00549664	45.2304	25.096
MDP0000936748	-1.84253	4.29411e-06	0.00104904	51.9623	28.2017
MDP0000264060	-1.86813	8.77032e-05	0.0125311	268.738	143.854
MDP0000171573	-1.95404	1.41661e-06	0.000405309	49.1642	25.1602
MDP0000317816	-2.0189	8.81777e-30	2.15415e-26	251.377	124.512
MDP0000162679	-2.06607	2.42584e-08	1.14909e-05	57.8165	27.9838
MDP0000854242	-2.27061	0.000433269	0.0460971	18.9865	8.36184
MDP0000310196	-2.27379	9.09571e-07	0.000286006	327.74	144.139
MDP0000123910	-2.34372	3.00608e-08	1.3937e-05	44.4192	18.9524
MDP0000380269	-2.348	0.000167677	0.0209653	123.668	52.6696
MDP0000698609	-2.37102	4.58646e-06	0.00109444	333.123	140.498
MDP0000948665	-2.38349	1.33413e-05	0.00272475	26.6292	11.1723
MDP0000238551	-2.42139	5.17531e-06	0.00122657	28.3906	11.7249
MDP0000219737	-2.48039	1.29058e-05	0.00265927	24.9792	10.0707
MDP0000233396	-2.56901	0.000342824	0.0376733	15.9163	6.19551
MDP0000482479	-2.5778	3.63646e-07	0.000123517	33.9756	13.18
MDP0000407382	-2.71892	1.90711e-07	7.34145e-05	30.9415	11.3801
MDP0000215478	-2.75585	2.04859e-23	4.64716e-20	111.245	40.3667
MDP0000230263	-2.81655	2.96545e-05	0.00518888	18.9369	6.72343
MDP0000193502	-4.68872	1.65609e-06	0.000463424	15.001	3.19937
MDP0000333088	-4.97583	4.6006e-06	0.00109444	13.1654	2.64588
