# Supplementary material for: Transcriptomic Signatures in Seeds of Apple (Malus domestica L. Borkh) during Fruitlet Abscission
Source: PLoS One. 2015 Mar 17;10(3):e0120503. doi: 10.1371/journal.pone.0120503 (PMC4364616; doi:10.1371/journal.pone.0120503)
Supplement: S3 Dataset — Only terms with more than 10 genes associated are shown, compared to the whole set of annotated apple genes for each term. (XLSX) [file pone.0120503.s003.xlsx]

## Sheet: Foglio1
PlantGOSlim GO terms associated with central fruit seeds transcriptome (only terms with more than 10 genes annotated)
GOterm	GO Class	GO Description	Sample counts	Background
GO:0009987	biological_process	cellular process	14099	21752
GO:0005515	molecular_function	protein binding	7500	11417
GO:0008152	biological_process	metabolic process	7265	12997
GO:0009058	biological_process	biosynthetic process	6686	9804
GO:0005488	molecular_function	binding	6102	9965
GO:0003824	molecular_function	catalytic activity	6028	10287
GO:0016020	cellular_component	membrane	5947	9199
GO:0000166	molecular_function	nucleotide binding	5942	9946
GO:0009536	cellular_component	plastid	5350	7385
GO:0006950	biological_process	response to stress	5337	8386
GO:0005634	cellular_component	nucleus	5152	7136
GO:0006810	biological_process	transport	4928	7446
GO:0016043	biological_process	cellular component organization	4795	6780
GO:0005886	cellular_component	plasma membrane	4715	6737
GO:0009056	biological_process	catabolic process	4535	6648
GO:0006464	biological_process	cellular protein modification process	4232	6601
GO:0016787	molecular_function	hydrolase activity	4183	6865
GO:0006139	biological_process	nucleobase-containing compound metabolic process	4082	5590
GO:0006519			3786	6196
GO:0005975	biological_process	carbohydrate metabolic process	3627	5499
GO:0009628	biological_process	response to abiotic stimulus	3603	5134
GO:0008150	biological_process	biological_process	3582	5708
GO:0005622	cellular_component	intracellular	3140	4549
GO:0005829	cellular_component	cytosol	3119	4184
GO:0016740	molecular_function	transferase activity	3086	5120
GO:0005739	cellular_component	mitochondrion	3024	4099
GO:0005737	cellular_component	cytoplasm	2886	4196
GO:0007275	biological_process	multicellular organismal development	2734	4112
GO:0007165	biological_process	signal transduction	2721	4221
GO:0006350			2702	4055
GO:0006629	biological_process	lipid metabolic process	2662	4090
GO:0003677	molecular_function	DNA binding	2414	3805
GO:0016301	molecular_function	kinase activity	2395	4467
GO:0019538	biological_process	protein metabolic process	2171	3160
GO:0009791	biological_process	post-embryonic development	2162	3033
GO:0009653	biological_process	anatomical structure morphogenesis	2059	3080
GO:0009607	biological_process	response to biotic stimulus	1943	2996
GO:0005215	molecular_function	transporter activity	1851	3118
GO:0000003	biological_process	reproduction	1779	2520
GO:0009719	biological_process	response to endogenous stimulus	1776	2742
GO:0019748	biological_process	secondary metabolic process	1660	2733
GO:0005794	cellular_component	Golgi apparatus	1516	1978
GO:0005773	cellular_component	vacuole	1489	2058
GO:0005654	cellular_component	nucleoplasm	1453	2315
GO:0006091	biological_process	generation of precursor metabolites and energy	1386	1949
GO:0006412	biological_process	translation	1335	1797
GO:0030154	biological_process	cell differentiation	1292	1928
GO:0005576	cellular_component	extracellular region	1264	2058
GO:0007049	biological_process	cell cycle	1222	1700
GO:0005840	cellular_component	ribosome	1213	1618
GO:0009908	biological_process	flower development	1157	1693
GO:0003676	molecular_function	nucleic acid binding	1122	1632
GO:0006259	biological_process	DNA metabolic process	1120	1588
GO:0003723	molecular_function	RNA binding	1111	1418
GO:0005783	cellular_component	endoplasmic reticulum	1048	1440
GO:0003700	molecular_function	sequence-specific DNA binding transcription factor activity	1034	1752
GO:0009790	biological_process	embryo development	1004	1394
GO:0005198	molecular_function	structural molecule activity	978	1313
GO:0005618	cellular_component	cell wall	972	1507
GO:0016049	biological_process	cell growth	946	1388
GO:0009579	cellular_component	thylakoid	876	1259
GO:0005730	cellular_component	nucleolus	863	1148
GO:0009605	biological_process	response to external stimulus	627	915
GO:0040029	biological_process	regulation of gene expression, epigenetic	614	820
GO:0003674	molecular_function	molecular_function	601	1370
GO:0015979	biological_process	photosynthesis	590	845
GO:0005856	cellular_component	cytoskeleton	550	770
GO:0008219	biological_process	cell death	483	769
GO:0019725	biological_process	cellular homeostasis	451	649
GO:0005768	cellular_component	endosome	450	558
GO:0030234	molecular_function	enzyme regulator activity	445	702
GO:0005623	cellular_component	cell	422	779
GO:0040007	biological_process	growth	400	571
GO:0007154	biological_process	cell communication	364	574
GO:0003682	molecular_function	chromatin binding	358	597
GO:0004871	molecular_function	signal transducer activity	354	517
GO:0009991	biological_process	response to extracellular stimulus	344	529
GO:0005777	cellular_component	peroxisome	342	494
GO:0008135	molecular_function	translation factor activity, nucleic acid binding	301	394
GO:0009856	biological_process	pollination	299	501
GO:0008289	molecular_function	lipid binding	299	436
GO:0004518	molecular_function	nuclease activity	282	371
GO:0030246	molecular_function	carbohydrate binding	273	548
GO:0009606	biological_process	tropism	251	355
GO:0004872	molecular_function	receptor activity	219	397
GO:0005575	cellular_component	cellular_component	210	300
GO:0005635	cellular_component	nuclear envelope	148	193
GO:0003774	molecular_function	motor activity	144	204
GO:0030528	molecular_function	transcription regulator activity	135	178
GO:0007267	biological_process	cell-cell signaling	97	180
GO:0009875	biological_process	pollen-pistil interaction	81	258
GO:0019825	molecular_function	oxygen binding	63	129
GO:0005102	molecular_function	receptor binding	54	73
GO:0009838	biological_process	abscission	44	82
GO:0007610	biological_process	behavior	36	49
GO:0005615	cellular_component	extracellular space	25	55
GO:0030312	cellular_component	external encapsulating structure	22	47
GO:0044699	biological_process	single-organism process	15	21
GO:0009835	biological_process	fruit ripening	12	25
