# Supplementary material for: Transcriptomic Signatures in Seeds of Apple (Malus domestica L. Borkh) during Fruitlet Abscission
Source: PLoS One. 2015 Mar 17;10(3):e0120503. doi: 10.1371/journal.pone.0120503 (PMC4364616; doi:10.1371/journal.pone.0120503)
Supplement: S4 Dataset — Worksheet: (3A) Biological process; (3B) Molecular function; (3C) Cellular component. P-values were calculated by Fisher’s exact test. (XLSX) [file pone.0120503.s004.xlsx]

## Sheet: S4A
GO terms of the biological process GO class associated with up-regulated (DE) genes in lateral fruit seeds compared to central
GO term	GO class	Description	Sample count	Background	p-value
GO:0006950	biological_process	response to stress	26	545	1.22581e-14
GO:0006334	biological_process	nucleosome assembly	9	171	2.43212e-06
GO:0009414	biological_process	response to water deprivation	14	464	2.81452e-06
GO:0009409	biological_process	response to cold	17	689	3.59813e-06
GO:0009611	biological_process	response to wounding	14	478	3.91059e-06
GO:0006012	biological_process	galactose metabolic process	9	214	1.36935e-05
GO:0006355	biological_process	regulation of transcription, DNA-dependent	30	1911	1.47355e-05
GO:0009816	biological_process	defense response to bacterium, incompatible interaction	5	65	8.10114e-05
GO:0051865	biological_process	protein autoubiquitination	3	11	8.34439e-05
GO:0080167	biological_process	response to karrikin	9	284	0.000112745
GO:0005975	biological_process	carbohydrate metabolic process	20	1252	0.000216136
GO:0071494	biological_process	cellular response to UV-C	2	2	0.000230552
GO:0046369	biological_process	galactose biosynthetic process	2	2	0.000230552
GO:0006835	biological_process	dicarboxylic acid transport	3	17	0.000254123
GO:0010200	biological_process	response to chitin	10	406	0.00034611
GO:0006970	biological_process	response to osmotic stress	5	93	0.000393559
GO:0009225	biological_process	nucleotide-sugar metabolic process	4	54	0.000487854
GO:0071705	biological_process	nitrogen compound transport	3	22	0.000500905
GO:0009607	biological_process	response to biotic stimulus	5	104	0.000639902
GO:0010024	biological_process	phytochromobilin biosynthetic process	2	5	0.000796938
GO:0033528	biological_process	S-methylmethionine cycle	2	6	0.00105818
GO:0045892	biological_process	negative regulation of transcription, DNA-dependent	6	186	0.00140252
GO:0006820	biological_process	anion transport	4	78	0.00178684
GO:0009408	biological_process	response to heat	9	424	0.00182701
GO:0009612	biological_process	response to mechanical stimulus	3	37	0.00200702
GO:0009750	biological_process	response to fructose stimulus	6	201	0.00204805
GO:0045487	biological_process	gibberellin catabolic process	2	9	0.00205288
GO:0006788	biological_process	heme oxidation	2	9	0.00205288
GO:0043617	biological_process	cellular response to sucrose starvation	2	10	0.00245328
GO:0051259	biological_process	protein oligomerization	2	10	0.00245328
GO:0009787	biological_process	regulation of abscisic acid mediated signaling pathway	2	10	0.00245328
GO:0042542	biological_process	response to hydrogen peroxide	7	288	0.00276654
GO:0006771	biological_process	riboflavin metabolic process	5	147	0.00278227
GO:0009646	biological_process	response to absence of light	3	42	0.00281664
GO:0045449			23	1863	0.00291779
GO:0010019	biological_process	chloroplast-nucleus signaling pathway	2	12	0.00335467
GO:0016036	biological_process	cellular response to phosphate starvation	6	229	0.00382215
GO:0009585	biological_process	red, far-red light phototransduction	3	48	0.00402071
GO:0002679	biological_process	respiratory burst involved in defense response	4	100	0.00421722
GO:0048523	biological_process	negative regulation of cellular process	2	14	0.00438732
GO:0070981	biological_process	L-asparagine biosynthetic process	2	15	0.0049518
GO:0006073	biological_process	cellular glucan metabolic process	3	52	0.00497268

## Sheet: S4B
GO terms of the molecular function GO class associated with up-regulated (DE) genes in lateral fruit seeds compared to central
GO term	GO class	Description	Sample count	Background	p-value
GO:0003978	molecular_function	UDP-glucose 4-epimerase activity	4	15	5.40875e-06
GO:0003677	molecular_function	DNA binding	41	3215	4.54457e-05
GO:0004722	molecular_function	protein serine/threonine phosphatase activity	8	245	0.000219654
GO:0047936	molecular_function	glucose 1-dehydrogenase [NAD(P)] activity	2	2	0.000230552
GO:0005509	molecular_function	calcium ion binding	13	652	0.000361474
GO:0008234	molecular_function	cysteine-type peptidase activity	7	205	0.000414721
GO:0046872	molecular_function	metal ion binding	29	2253	0.000442018
GO:0005544	molecular_function	calcium-dependent phospholipid binding	4	53	0.000456459
GO:0019776	molecular_function	Atg8 ligase activity	2	4	0.00057161
GO:0019786	molecular_function	APG8-specific protease activity	2	5	0.000796938
GO:0004097	molecular_function	catechol oxidase activity	3	27	0.000863892
GO:0019779	molecular_function	APG8 activating enzyme activity	2	6	0.00105818
GO:0005310	molecular_function	dicarboxylic acid transmembrane transporter activity	2	6	0.00105818
GO:0034256	molecular_function	chlorophyll(ide) b reductase activity	2	6	0.00105818
GO:0003700	molecular_function	sequence-specific DNA binding transcription factor activity	23	1752	0.00126404
GO:0008898	molecular_function	homocysteine S-methyltransferase activity	2	9	0.00205288
GO:0004392	molecular_function	heme oxygenase (decyclizing) activity	2	9	0.00205288
GO:0000976	molecular_function	transcription regulatory region sequence-specific DNA binding	3	40	0.00247238
GO:0052634	molecular_function	C-19 gibberellin 2-beta-dioxygenase activity	2	11	0.00288735
GO:0008515	molecular_function	sucrose transmembrane transporter activity	2	12	0.00335467
GO:0043424	molecular_function	protein histidine kinase binding	3	46	0.00359012
GO:0016762	molecular_function	xyloglucan:xyloglucosyl transferase activity	3	52	0.00497268
GO:0003993	molecular_function	acid phosphatase activity	4	105	0.00497925

## Sheet: S4C
GO terms of the cellular component GO class associated with up-regulated (DE) genes in lateral fruit seeds compared to central
GO term	GO class	Description	Sample count	Background	p-value
GO:0000786	cellular_component	nucleosome	9	151	9.18034e-07
GO:0042170	cellular_component	plastid membrane	3	19	0.000340105
GO:0008287	cellular_component	protein serine/threonine phosphatase complex	8	266	0.000373947
GO:0005775	cellular_component	vacuolar lumen	2	8	0.00168661
GO:0031966	cellular_component	mitochondrial membrane	3	36	0.00186511
GO:0005618	cellular_component	cell wall	15	990	0.00203106
GO:0033095	cellular_component	aleurone grain	2	9	0.00205288
GO:0005667	cellular_component	transcription factor complex	23	1840	0.00267115
