# Supplementary material for: Transcriptomic Signatures in Seeds of Apple (Malus domestica L. Borkh) during Fruitlet Abscission
Source: PLoS One. 2015 Mar 17;10(3):e0120503. doi: 10.1371/journal.pone.0120503 (PMC4364616; doi:10.1371/journal.pone.0120503)
Supplement: S5 Dataset — Worksheet: (4A) Biological process; (4B) Molecular function; (4C) Cellular component. P-values were calculated by Fisher’s exact test. (XLSX) [file pone.0120503.s005.xlsx]

## Sheet: S5A
GO terms of the biological process GO class associated with down-regulated (DE) genes in lateral fruit seeds compared to central
GO term	GO class	Description	Sample count	Background	p-value
GO:0051592	biological_process	response to calcium ion	2	3	3.67739e-06
GO:0030026	biological_process	cellular manganese ion homeostasis	2	9	2.01763e-05
GO:0006793	biological_process	phosphorus metabolic process	2	10	2.42016e-05
GO:0006885	biological_process	regulation of pH	3	113	5.41324e-05
GO:0006874	biological_process	cellular calcium ion homeostasis	2	31	0.000191965
GO:0009624	biological_process	response to nematode	3	215	0.000347121
GO:0006882	biological_process	cellular zinc ion homeostasis	2	43	0.000358183
GO:0006812	biological_process	cation transport	4	544	0.00039304
GO:0070588	biological_process	calcium ion transmembrane transport	2	54	0.000554689
GO:0009631	biological_process	cold acclimation	2	58	0.000636497
GO:0010351	biological_process	lithium ion transport	2	63	0.000746457
GO:0006816	biological_process	calcium ion transport	3	323	0.00111008

## Sheet: S5B
GO terms of the molecular function GO class associated with up-regulated (DE) genes in lateral fruit seeds compared to central
GO term	GO class	Description	Sample count	Background	p-value
GO:0015369	molecular_function	calcium:hydrogen antiporter activity	3	11	8.14713e-08
GO:0008324	molecular_function	cation transmembrane transporter activity	3	52	5.76228e-06
GO:0003939	molecular_function	L-iditol 2-dehydrogenase activity	2	22	0.000100714
GO:0016829	molecular_function	lyase activity	3	254	0.000559868
GO:0004857	molecular_function	enzyme inhibitor activity	2	164	0.00471781

## Sheet: S5C
GO terms of the cellular component GO class associated with down-regulated (DE) genes in lateral fruit seeds compared to central
GO term	GO class	Description	Sample count	Background	p-value
GO:0009705	cellular_component	plant-type vacuole membrane	2	149	0.00392508
